# Supplementary figures and images for: Complexes of ditopic carbo- and thio-carbohydrazone ligands – mononuclear, 1D chain, dinuclear and tetranuclear examples
Source: Royal Society of Chemistry journal article supplement (doi:10.1039/c0dt01487g), 2011-01-01

## Supplementary material

Fig. S1.

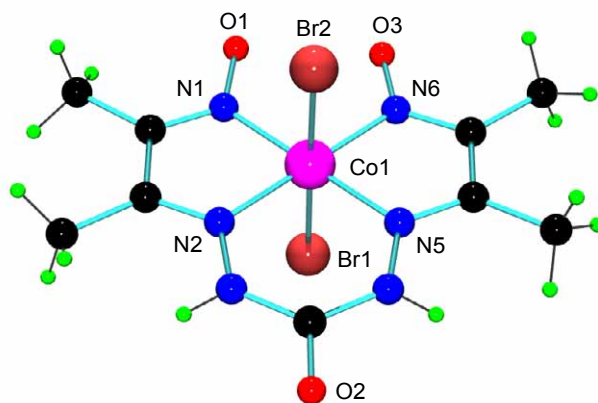

Supplement: c0dt01487g.pdf [file c0dt01487g.pdf]
